# Supplementary material for: Automated Detection and Chemical Characterization of Anomalous Grains in Scientific Ocean Drilling Legacy Cores
Source: Copernicus journal article supplement (doi:10.5194/egusphere-2025-2760), 2025-07-01
Supplement: Supplementary file [file egusphere-2025-2760-RC2-supplement.pdf]

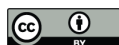

# Automated Detection and Chemical Characterization of Anomalous Grains in Scientific Ocean Drilling Legacy Cores

Gerald Auer<sup>1</sup>, David De Vleeschouwer<sup>2</sup>, Arisa Seki<sup>3</sup>, Anna Joy Drury<sup>4,5</sup>, Yusuke Kubo<sup>6</sup>, Minoru Ikehara<sup>7</sup>, Junichiro Kuroda<sup>8</sup>, and the ReC23-01 scientists\*

<sup>1</sup>Department of Earth Sciences, NAWI Graz Geocenter, University of Graz, Graz, 8010, Austria

<sup>2</sup>Institute of Geology and Palaeontology, University of Münster, Münster, Germany

<sup>3</sup>Faculty of Science, Shinshu University, Matsumoto, Nagano, Japan (now at Fukada Geological Institute, Bunkyo-ku, Tokyo, Japan)

<sup>4</sup>School of Geography, Geology, and the Environment, University of Leicester, Leicester, UK

<sup>5</sup>Department of Earth Sciences, University College London, London, UK

<sup>6</sup>Kochi Institute for Core Sample Research, Japan Agency for Marine-Earth Science and Technology, Kochi, Japan

<sup>7</sup>Marine Core Research Institute, Kochi University, Kochi, Japan

<sup>8</sup>Atmosphere and Ocean Research Institute, The University of Tokyo, Kashiwa, Chiba, Japan

\*see team list for all team authors and their affiliations

Correspondence to: Gerald Auer (gerald.auer@uni-graz.at)

**Abstract.** The dynamic behavior of glaciers under varying climatic conditions plays a crucial role in Earth's climate systems, necessitating reliable records of glacial extent throughout the Cenozoic era. Ice-rafted debris (IRD) provides insights into past iceberg activity, glacial erosion rates, sediment transport, and meltwater delivery. Polar IRD reconstructions can enhance our understanding of ice sheet responses to climate shifts, however, traditional methods for detecting IRD are often destructive and labor-intensive. This study proposes a new methodological framework for detecting IRD in marine sediments as a proxy for reconstructing polar paleoclimate variability and glacial dynamics. Our new multi-proxy approach utilizes micro-X-ray fluorescence ( $\mu$ XRF) 2D imaging and computed tomography (CT) 3D scanning on five Deep Sea Drilling Project (DSDP) Site 266 archive half-sections. Our findings reveal that non-destructive scanning techniques have significant potential to effectively identify and quantify IRD, with  $\mu$ XRF providing high-resolution geochemical mapping and CT imaging enabling three-dimensional visualization of sediment structures. Machine learning classification of CT data using the Waikato Environment for Knowledge Analysis (WEKA) in the Fiji software package is a powerful tool for fast detection of anomalous components in IODP cores. However, we established that the finding of such coupled machine learning-CT approaches must be ground-truthed to ensure accuracy: our application of automated (k-means cluster analyses) chemical fingerprinting based on the  $\mu$ XRF data revealed many of the grains identified in the CT classification were false positives due to contamination from drill pipe flakes. We confirmed this contamination using scanning electron microscopy energy dispersive spectroscopy (SEM-EDS) on targeted samples. Fundamentally, our multi-proxy approach underscores that this approach alone cannot provide the geochemical fingerprinting necessary for unequivocal IRD identification. We therefore recommend a combined approach applying  $\mu$ XRF for geochemical fingerprinting and CT for structural detection to ensure a comprehensive, non-destructive method for IRD verification and preliminary provenance analysis. Ultimately, our work underscores the importance of applying stringent ground truthing to machine learning and high-resolution image datasets to ensure the data quality necessary for robust palaeoclimate reconstructions.



Keywords: Ice-rafted debris, Machine-learning in Geosciences, Non-destructive paleoclimate proxies, Marine sediment cores.

## 1 Introduction

The dynamic and geographical range of glaciers under variable climatic conditions is a key feedback in the Earth's climate systems. Thus, generating reliable records for glacial extent throughout the Cenozoic is critical. Ice-rafted debris (IRD) in marine sediments, in particular, is a crucial proxy to reconstruct polar paleoclimate variability and glacial dynamics. The presence and distribution of IRD inform interpretations of past iceberg activity, glacial erosion rates, sediment transport, and meltwater delivery (Grobe, 1987; McKay et al., 2022; Patterson et al., 2014; Starr et al., 2021; von Huene et al., 1973; Williams et al., 2010). Generating reliable IRD records is thus important to understanding how ice sheets responded to climate shifts over geological timescales.

Early methods developed for IRD detection and quantification focused on quantifying sand and gravel content over 20–30 cm core sections (Conolly and Ewing, 1965; Smith et al., 1983) or sieving 100 g of dry sediment to measure pebble content within the 1–2 cm size range (Vorren et al., 1989). Based on these early approaches, methodologies for detecting ice-rafted debris (IRD) have evolved significantly over the past decades. Due to the limited sample availability in scientific drilling cores, particularly in polar regions, less destructive methods gained traction. These approaches primarily rely on manual picking and counting IRD from sieved sediment residues within defined size fractions, and were standard practice until the late 1980s (Grobe, 1987). Such methods include manually analysing angular sand-sized quartz grains (63–250  $\mu\text{m}$ ) under a microscope (Ledbetter and Watkins, 1978; Watkins et al., 1974, 1982) or counting lithic components in the  $>63 \mu\text{m}$  fraction of sediment by weight (Labeyrie et al., 1986). Generally, grain size-based IRD quantification, including weight percentages of specific fractions (e.g.,  $>63 \mu\text{m}$  or 63–1000  $\mu\text{m}$ ), has been the most commonly used method (Bornhold, 1983; Cooke and Hays, 1982; Kent et al., 1971; Piper and Brisco, 1975). However, this approach requires corrections for biogenic, volcanic, or diagenetic grains, adding complexity and demanding significant manual labour (Bornhold, 1983; McKay et al., 2022). The advent of Laser Particle Size Analysis (LPSA) has streamlined size-based IRD detection but introduces challenges such as small sample volumes ( $<1 \text{ g}$ ) and limited control over contaminants (Hansen et al., 2015; Passchier, 2011; Passchier et al., 2021). Despite their utility, the varied size definitions and methodological protocols lead to concerns about possible inconsistencies between studies (Grobe, 1987; Kanfoush et al., 2000). This lack of standardisation has fuelled ongoing debates about the comparability of results (McKay et al., 2022).

In practice the longest ranging IRD records can be feasibly reconstructed from marine sediment cores recovered through scientific ocean drilling initiatives, such as the International Ocean Discovery Program (IODP; 2013–2024) and its predecessors – the Integrated Ocean Drilling Program (IODP, 2003–2013), Ocean Drilling Program (ODP, 1985–2004), and

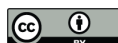

66 Deep Sea Drilling Project (DSDP, 1968–1983). The legacy cores of the IODP program family are curated in three repositories:  
67 the Gulf Coast Repository (GCR, USA), the Bremen Core Repository (BCR, Germany), and the Kochi Core Center (KCC,  
68 Japan). Collectively, these repositories house over five decades of marine sedimentary and stratigraphic archives, offering a  
69 unique opportunity to assess changes in ice-sheet behaviour and climate using legacy material. For instance, the earliest studies  
70 of Antarctic IRD from deep marine sites were conducted on DSDP Sites 268, 269, and 274, drilled during Leg 28 (December  
71 1972 to February 1973). Piper and Brisco (1975) reported “large numbers of dispersed pebbles” in these Leg 28 cores, some  
72 embedded in deep-water pelagic sediments. Despite challenges in obtaining representative quantifications of IRD pebbles  
73 (e.g., Conolly and Ewing, 1965; Vorren et al., 1989), it was determined that analysing the sand-sized fraction is an effective  
74 method for identifying IRD. This approach, first applied to DSDP cores and subsequently to later ODP and IODP materials,  
75 builds on methodologies developed to study Arctic IRD around Alaska from cores recovered during DSDP Leg 18 (von Huene  
76 et al., 1973).

77 Innovative approaches emerged with the introduction of non-destructive scanning techniques for identifying dense IRD  
78 components, such as X-radiographs, 3D computed tomography (CT), and X-ray fluorescence (XRF). These non-destructive  
79 methods are increasingly favoured, particularly for IODP legacy cores with limited sample volume. von Huene et al. (1973)  
80 pioneered using X-radiographs to identify IRD by visually counting pebbles in archive halves of cores and combining them  
81 with post-cruise X-radiography. Grobe (1987) refined this approach by incorporating whole-round x-radiographs for  
82 quantifying IRD >2 mm in 1 cm core intervals. Subsequent tests demonstrated the reliability of X-ray imaging methods  
83 compared to traditional manual counts, making it a preferred technique for assessing iceberg activity. Today, X-radiography  
84 is frequently complemented by 3D computed tomography (CT) scanning to enhance precision. Recent advances also include  
85 automated IRD identification using convolutional neural networks (e.g., Jasper et al., 2024). However, these methods have  
86 only been recently developed and have yet to be adopted by the wider community.

87 In addition, XRF core scanning elemental data have also been shown to have potential use in the non-destructive identification  
88 of IRD-derived sedimentary layers, such as those formed during the Heinrich stadials of the last glacial (Hodell et al., 2008).  
89 These methods, however, are not applied often, as the small scan area of standard XRF core scanners limits the detection of  
90 dispersed or larger discrete IRD. To alleviate issues related to limited detector area, micro-XRF ( $\mu$ XRF) core scanning has  
91 recently gained popularity for providing high-resolution, non-destructive geochemical mapping. Detailed elemental analysis  
92 across the core section surface is achievable using instruments like the widely available Bruker M4 Tornado (20 x 16 cm  
93 capacity) and the newly developed M6 JETSTREAM (80 x 60 cm capacity). These 2D elemental maps offer insights into  
94 mineral composition and sedimentary variations (Feignon et al., 2021; Frery et al., 2021; Kaskes et al., 2021, 2024; Yang et  
95 al., 2018). These advances preserve core integrity while yielding critical data for provenance studies and IRD research (Bailey  
96 et al., 2012). The resulting geochemical maps allow for the differentiation between different sedimentary components, the  
97 identification of mineral phases, and the detection of compositional variations. Recent instrument advancement significantly

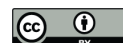

expands the scope of  $\mu$ XRF applications (see methods), as it is now possible to investigate entire core sections and other large-scale geological samples. This large-area scanning capability is especially advantageous for ice-rafted debris (IRD) studies, enabling efficient coverage of multiple core sections at high throughput. Several challenges remain in the accurate identification of IRD, despite significant advancements in non-destructive IRD detection methodologies, including the lack of standardisation across studies, the integration of automated approaches, and the limited capacity for simultaneous provenance and geochemical analyses (Jasper et al., 2024; McKay et al., 2022). Here, we address these open questions evaluating the potential of integrating existing approaches with modern non-destructive techniques, such as  $\mu$ XRF imaging and k-means clustering. We ultimately propose a multi-proxy non-destructive approach combining large-chamber  $\mu$ XRF and CT scanning to provide a unified and efficient framework for IRD detection, differentiation, and geochemical characterisation in marine sediment cores.

## 2 Materials and Methods

### 2.1 Site Location and Sampling during ReC23- 01

In 2023, the Repository Core Rediscovery Program (ReCoRD) program was initiated by a joint venture of the Kochi Core Center (KCC), Kochi University, and the Japan Drilling Earth Science Consortium (J-DESC) as a new workshop type, providing access to IODP cores archived at the KCC in Kochi, Japan. The first international ReCoRD workshop, ReC23-01, 'Tracing Intermediate Water Current Changes and Sea Ice Expansion in the Indian Ocean', was held between the 27<sup>th</sup> of August and the 5<sup>th</sup> of September, 2023 at the KCC in Kochi (Auer et al., 2024).

One of the objectives of ReC23-01 was to gather new data to test the hypothesis that the expansion of sea ice around Antarctica impacted water circulation in the Indian Ocean. To this end, several Indian Ocean legacy sites were re-described sedimentologically and analysed with state-of-the-art techniques like CT and  $\mu$ XRF scanning. Site 266 was drilled during DSDP Leg 28 between Jan 2<sup>nd</sup> and Jan 4<sup>th</sup>, 1973, in a present-day water depth of 4167 m (corrected echo sound depth). DSDP Site 266 is located in the southernmost Indian Ocean between Australia and Antarctica (56°24.13'S, 110°06.70'E; Fig. 1; Hayes et al., 1975), along the south flank of the Southeast Indian Ridge, about 800 km from the Ridge Crest. Site 266 was initially targeted by Leg 28 to recover a Neogene sedimentary sequence unaffected by tectonic activity in the Indian Ocean section of the Southern Ocean (Hayes et al., 1975). It is, therefore, an ideal paleoceanographic target for studying the northward migration of the polar frontal system during the Neogene. Site 266 is also located at the northernmost extent of large Antarctic iceberg concentrations (Romanov et al., 2017) it is a key location to capture the inception of iceberg advance into the present-day polar front. To test our non-destructive multi-proxy approach, we targeted three core sections of DSDP Site 266 (Sections 266-8R-3A, 266-9R-1A, and 266-9R-2A). These cores were selected based on limited shipboard biostratigraphic information (Hayes et al., 1975) to fall in the interval after the Middle-Late Miocene re-expansion of Antarctica, but before

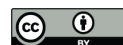

the larger Quaternary glaciations. This interval was chosen to ensure IRD was present, but not in significantly large amounts that could be easily identified by eye, so that the efficiency of the non-destructive techniques could be properly tested.

## 2.2 Micro X-ray Fluorescence Core Scanning and k-means clustering multivariate statistics

For micro X-ray fluorescence core scanning ( $\mu$ XRF-CS), we scanned five archive half core sections from DSDP Site 266 with a Bruker M6 JETSTREAM to at the Bruker Japan X-ray Division Demo Center (see Fig. 3). This device was specifically selected as a test case, as the chamber dimensions of the more prevalent Bruker M4 Tornado and other similar devices restricts the sample-size that can be analysed, limiting their application to marine drill core sections. The introduction of an open-beam system pioneered by the Bruker M6 JETSTREAM means that larger samples can now be analysed as is, including standard IODP cores. As the length of some sections was longer than the maximum measurement area of the M6 JETSTREAM ( $80 \times 60 \text{ cm}^2$ ), the upper and lower halves of the sections were measured separately for 1.5 m sections. The mapping resolution (pixel size) was  $500 \mu\text{m} \times 500 \mu\text{m}$ , and scan speed was 5.5 ms/pixel for this machine demonstration. The X-ray source was set at 50 kV and 600  $\mu\text{A}$ . A 1000  $\mu\text{m}$  aperture management system was applied to account for surface irregularities. This system, available in the analysis software, dynamically adjusts the aperture setting to provide a consistent beam diameter regardless of the distance between the sample surface and X-ray source in case of surface irregularities. All measurements were done under atmospheric conditions.

To objectively differentiate sediment types and anomalous grains in the  $\mu$ XRF datasets, we applied k-means clustering to the elemental maps using the base kmeans() function in the R stats package (R Core Team, 2024). Prior to clustering, the  $\mu$ XRF count data for each pixel were standardised (z-score normalisation) to ensure comparability across elements with different count magnitudes. Clustering was performed using only those elements with sufficiently high and consistent signal counts across all sections: Al, Ca, Fe, K, Mn, Ni, Pb, Rb, S, Si, Sr, Ti, Zn, and Zr. For each core section, we tested multiple values of k. We visually evaluated the cluster outputs to ensure meaningful sedimentological interpretation, selecting  $k = 3$  for 266-8R-3A, and  $k = 4$  for 266-9R-1A and 266-9R-2A, using 10 random starts and a maximum of 100 iterations. Clusters were then visualised spatially to identify and isolate anomalous grains based on elevated Fe, Mn, and Zn counts. Full clustering code and input parameters are provided in the supplementary material (Auer et al., 2025).

## 2.3 CT-scanning and CT-based IRD quantification using the Waikato Environment for Knowledge Analysis (WEKA)

To generate a CT-image-based IRD record for the three test sections, CT scans of the archive half-core sections were produced at the KCC using Hitachi Medical Corporation with a  $310 \mu\text{m}/\text{pixel}$  spatial resolution. We note that the comparatively low resolution of such medical-grade CT scanners limits IRD detection only to larger pebble grains of at least 600 - 1000  $\mu\text{m}$  in diameter.



Nine archive half-core sections were stacked together on the scanner bed for scanning operation and scanned simultaneously. All sections remained in their D-tubes during this process. Individual core sections were subsequently automatically processed into individual image sets by separating each core image along the respective D-tube of the core section. This methodology guarantees optimal use of scanning time and provides fast processing of large quantities of the legacy core at the KCC. After analysis, semi-automated brightness and contrast adjustments were applied to all CT-image stacks of the targeted sections to ensure comparable density brightness relationships between stacks. The CT stacks were subsequently processed with Fiji (ImageJ) (Schindelin et al., 2012), applying the trainable 3D-WEKA segmentation based on the Waikato Environment for Knowledge Analysis (WEKA) environment (Arganda-Carreras et al., 2017; <https://imagej.net/plugins/tws/>). As implemented in Fiji, the WEKA segmentation plugin provides a comprehensive set of open-source machine learning algorithms combined with image tools in a graphical user interface. It has been implemented for both 2D and 3D image sets. The plugin offers the option to define multiple classes depending on the needs of the study. Once the number of classes is determined, training sets can be generated through the graphical user interface (Fig. 2a, 2b). Sets can be adjusted and refined depending on the outputs of the machine learning classifier until a satisfactory output is reached (Figure 2c, 2d). Crucially trained classifiers can be easily saved and loaded for later use. The output of the classifier can then be saved as a new image (or image stack) and used for further analyses, such as thresholding, 3D rendering, or any required statistical analyses (i.e., calculation of pixel abundances) using freely available statistical and image analysis tools in Fiji.

For training, we defined five classes based on key features and used them for the automatic identification of features in the core images (Fig. 2). These selected features include voids (= air), the core liner, D-tube, sediment, cracks within the sediment, and higher-density grains/components within the sediment. The results were quantified based on the sum of pixels assigned to each class using the quantification tools in Fiji, based on  $3.88 \times 10^7$  classified pixels. Subsequent trial applications of the trained WEKA classifier outside the selected target sections for  $\mu$ XRF scanning yielded mixed results (see discussion for details).

## 2.4 Manual IRD Picking and Scanning Electron Microscopy-based Energy Dispersive X-ray Spectroscopy

One test sample from Site 266 Core 9R-2W was washed and picked for IRD. The sample was freeze-dried, after which a split of 7.274 g of dry sediment was wet-sieved through 125  $\mu$ m and 63  $\mu$ m mesh sieves. The recovered sediment fractions were oven dried at 45°C for 24h. The 125  $\mu$ m fractions were picked for IRD, and 19 potentially lithic grains and one fish tooth (Fig. 2), were picked and mounted on a scanning electron microscope (SEM) stub. All grains were imaged and measured using a Keyence VHX-7000 digital microscope and subsequently coated with C-Pt (0.5nm and 3nm, respectively) using a Leica ACE600 sputter coater for SEM analyses. SEM analyses were performed with a Zeiss Gemini DSM 982 at the University of Graz equipped with an Oxford UltimMax 40 silicon drift energy dispersive X-ray spectroscopy (EDS). The grains were imaged using secondary electron detector imaging and subsequently analysed for their elemental composition using EDS analysis. Quantitative elemental analysis, element mappings, and mineral phase classification were performed using the commercially available Oxford AZtec® software suite.



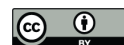

## 3 Results

### 3.1 Micro X-ray Fluorescence Core Scanning

The clearest elemental signals in all analysed sections were associated with Ca and Fe, which is consistent with the lithological composition of these sediments, dominated by a mixture of coccolithophore ooze and diatom ooze (Auer et al., 2024; Hayes et al., 1975). Relatively low counts of Al and Si, which are nevertheless expected to be significant sediment components, can be attributed to two factors. First, the measurements were conducted under atmospheric conditions, reducing detection efficiency for lighter elements like Si and Al due to the greater absorption of low-energy X-rays by air. Second, elemental counts in XRF data do not scale linearly with elemental concentrations, as differences influence them in fluorescence yield, matrix effects, and atmospheric absorption. Notably, several localised zones enriched in Fe and Mn, occasionally accompanied by Zn enrichment, provide evidence of anomalous grains within the otherwise pelagic sediment. A particularly prominent feature is an anomalous grain identified in the upper portion of 266-9R-1A, measuring approximately 3 cm wide and 1 cm long, with a distinctive co-enrichment of Fe, Mn, and Zn (Fig. 4).

A k-means multivariate approach enabled the 2-dimensional spatial classification of distinct sedimentary components (e.g., clay-rich, diatom ooze, carbonate ooze), as well as the identification of cracks and the highlighting of geochemical outliers, such as anomalous grains potentially related to IRD. In 266-8R-3A, 266-10R-3A, and 266-11R-2A, the Fe distribution is relatively homogeneous, with no significant anomalies detected by the clustering algorithm (Fig. 5a). In contrast, sections 266-9R-1A and 266-9R-2A exhibit distinct localised zones of elevated Fe, highlighted by the contours. These zones correspond to the anomalous grains identified during clustering analysis, particularly in 266-9R-1A, where the most prominent grain is characterised by pronounced co-enrichment of Fe, Mn, and Zn. Thereby, Fe is the signature element for identifying anomalous grains, which are interpreted as geochemical outliers within the pelagic sediment matrix in 266-9R-1A and 266-9R-2A. Figure 5 illustrates the distribution of Fe counts derived from micro-XRF scans for core sections 266-8R-3A, 266-9R-1A, and 266-9R-2A, overlaid with contour plots delineating regions of anomalous grains based on the k-means classification.

In 266-8R-3A, the three delineated clusters corresponded to clay-rich sediment, diatom-rich sediment, and cracks (Fig. 6). In this section as well as 266-10R-3A and 266-11R-2A (not figured), the analysis thus not identify any anomalous grains present at the core surface. The analysis with  $k=4$  in 266-8R-3A further subdivided the pelagic sediments without producing meaningful new insights when focused on anomalous grain detection. In contrast, clustering with  $k=4$  in sections 266-9R-1A and 266-9R-2A yielded sedimentologically meaningful results (Fig. 6). Two clusters corresponded to different sediment types (clay- and diatom-rich), one cluster captured cracks, and the fourth cluster identified anomalous grains with enhanced Fe, Mn, and Zn signals. These results aligned with the observed grain described earlier in 266-9R-1A and confirmed its distinct geochemical signature as a potential IRD-related feature.



## 3.2 CT-scanning and WEKA Classification

Applying the training set defined on Core 266-9R-1A to our four other sections resulted in five fully classified core sections (Tab. 1). The data is presented in percentage values following the individual assignment of all  $3.88 \times 10^7$  pixels. Raw data output for each analysed section can be found in the supplementary material (Auer et al., 2025). Crucially, the advantage of WEKA (or other machine learning) based algorithms is that the results include the brightness of each pixel (i.e., classical thresholding) and the overall image composition and pattern shapes of defined traits within training sets. It was thereby possible to distinguish cracks in the sediment from large voids (such as the space between the liner and the D-tube).

## 3.3 IRD Picking and SEM-EDS analyses of grains

The IRD identification based on 20 grains from sample 266-9R-2W 72/74 to groundtruth the validity of both  $\mu$ -XRF and CT-scanning yielded surprising results. Of all 20 grains in the  $> 125 \mu\text{m}$  fraction, 17 are identifiable as angular to sub-angular lithic grains and can be classified as IRD. One grain was identified as the cusp of a fish tooth, and two were initially classified as “unknown flakes”. Subsequent SEM-EDS analysis showed that identified IRD grains are angular to subangular grains of quartz, plagioclase, and albite. The grain size of picked IRD ( $n = 17$ ) ranges between 244.93 and 805.23  $\mu\text{m}$  (avg. 517.63; Tab. 2). One grain (IRD\_02) consisted of a complex, pegmatitic Na-Feldspar (albite) with a complex accessory mineral assemblage including quartz, K-rich feldspar (orthoclase), rutile, apatite, and biotite. Another grain (IRD\_15) consists of a complex Ni-Al with accessory amounts of Zn, Cu, Si, and Fe. Additionally, two of the picked grains display an angular flake-like nature, with a distinct reddish brown to black habitus. Closer analyses of these grains revealed they were composed of Fe, Mn, and V and their corresponding hydroxides and/or oxides (Tab. 3).

## 4 Discussion

### 4.1 Trainable 3D WEKA-Image segmentation - A promising tool for IRD identification

The output of the CT scanner resulted in some caveats underscored by the IRD-picking results. The image resolution of a Hitachi PRATICO medical CT scanner ( $310 \times 310 \mu\text{m}$  per pixel) makes it impossible to detect smaller IRD ( $< 650 \mu\text{m}$ ) based on the theoretical limitations due to detector aliasing. Conservatively, we thus assume that only grains of at least 1000 to 1500  $\mu\text{m}$  can be detected consistently (Takase, 2024). This technological detection limit will naturally lead to a potential bias in the resulting IRD abundances and consistency in detection, especially since smaller size fractions ( $> 125$  to  $1000 \mu\text{m}$ ) of IRD may prove critical for defining IRD presence (and variability) in more distal sites in the southern hemisphere high latitudes.

Nevertheless, WEKA-based machine learning segmentation worked exceptionally well in the core sections used for training (266-8R-3A and 266-9R-2A). Complete and accurate classification could already be achieved by minimal training. The training involved manually classifying only 2-10 individual CT-image slices, which took less than 5 minutes each. All other



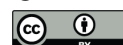

selected presented core sections were then successfully classified, yielding simple-to-extract and easy-to-process data (see Tab. 1). In addition to consistently detecting high-density grains, our WEKA-based classification approach also allowed the quantification of sediment alteration. For instance, we could quickly evaluate the quantity and position of cracks within the studied legacy core material. However, issues were still encountered when WEKA training was applied indiscriminately without basic sedimentological and drilling technological considerations. For instance, our presented training set failed to classify the bulk sediment correctly when using it to core sections recovered at shallower drill depths (i.e., Cores 266-1R to 266-3R). While high-density grains were still identified consistently, the reduced sediment density upcore made it difficult for the classifier to accurately identify sediment and associated structures (cracks/voids) throughout the test Site. Due to this natural change in sediment dry bulk density downcore, it will likely be necessary to select discrete intervals based on dry bulk density (DBD) thresholds to train several WEKA classifiers, should this approach be used in a larger context. Considering WEKA's fast and easy training process, generating additional training sets tailored to specific DBD thresholds can easily overcome this limitation. Evaluation of the effect of downcore DBD changes on WEKA-based image classifiers would have been a critical next step if other issues (see below) had not precluded further advancement of this part of the study.

#### 4.2 Advantages and pitfalls of $\mu$ XRF-based elemental analysis of IRD

The analysed sections from DSDP Site 266 were selected to identify and characterise the geochemical signatures of ice-rafted debris (IRD) through micro-XRF core scanning, leveraging its high-resolution, non-destructive capabilities. The anomalous grains identified in sections 266-9R-1A and 266-9R-2W are notably enriched in metals, particularly Fe, Mn, and Zn, distinguishing them from the surrounding pelagic (clay- or diatom-rich) sediment (Fig. 5). In this case, k-means clustering successfully detected these grains when they were present. However, determining the optimal number of clusters ( $k=3$  or  $k=4$ ) required some manual inspection to ensure the most meaningful results. This semi-automated approach demonstrates promise in detecting anomalous grains, which supports the broader ambition of systematically identifying and chemically characterising anomalous grains, such as IRD, in marine sediment cores. Here, the combined evaluation of segmented CT-scanning 3D image information and the 2D elemental data of the M6 JETSTREAM has proven especially invaluable (Fig. 7).

However, some suspicion arises about the exact nature of the anomalous grains. Ideally, IRD should reflect a typical lithic composition containing Si, Al, Fe, Ti, Mg, and similar common elements, with Mn only being a trace element. Therefore, the consistent co-occurrence and strong signal in the  $\mu$ XRF results required an alternative explanation. One hypothesis could be that these areas represent ferromanganese nodules or Fe/Mn crusts coating IRD or other lithogenic components, which could be a distinct possibility in the study region (Albarède et al., 1997; Verlaan et al., 2004). Ferromanganese nodules and crusts are known to contain other easily detectable elements such as Ti, Cu, Co, and Ni alongside Fe and Mn, albeit in lower quantities. However, higher concentrations of these elements were not observed in the  $\mu$ XRF results.



As these accessory elements, however, usually occur only > 1 wt. % within Indian Ocean ferromanganese nodules (Albarède et al., 1997), non-detection due to instrumental limitation could not be discounted a priori. It was, therefore, deemed necessary to assess the chemical composition of potential IRD grains in the sediment using SEM-EDS. These analyses of all 17 IRD grains from sample 266-9R-2W 74/5 (Fig. 8a) showed that the grains are of felsic composition (Tab. 2, Fig. 8b) and confirmed that they do not have ferromanganese coatings. Conversely, the two additional “flake-shaped” grains that were encountered and picked within the washed sediment showed high Fe and Mn concentrations indicative of Fe-Mn steel commonly used as drill pipe material (Fig. 8a). These flakes were identified as Fe-Mn-V phases with a distinct metallic shine and showed signs of possible Fe(III)-oxide-hydroxide alterations (Fig. 8c). The elemental composition of these two flakes are a close match with the typical composition of API drill pipe steel (Godefroid et al., 2017; Ziomek-Moroz, 2012; Fig. 8c; Table 3), with small compositional differences potentially explained by analytical imprecision and the possibility that the GLOMAR Challenger used custom steel for its drill pipes. Using the EDS analysis, we can identify that the two recovered flakes were rusted pieces of drill pipe steel that contaminated the sediment of Site 266. Drill pipe contamination had been noted by the Leg 28 scientific party (Hayes et al., 1975). The ReC23-01 team also observed heavy contamination at core ends and the edges of the core liner of both archive and working halves at Site 266. However, the authors were unaware of the extent of drill pipe contamination within the body of the recovered sediment until this was revealed by later analysis.

#### 4.3 Implications for non-destructive multi-proxy approach to identifying IRD in IODP/ODP/DSDP legacy cores

Our non-destructive multi-proxy approach combining CT and  $\mu$ XRF scanning results in a consistent framework for high-resolution imaging of IODP legacy core material, with demonstrable value in rapidly identifying and chemically classifying IRD (especially in the size range 1000-1500  $\mu$ m). The  $\mu$ XRF scanner results were extremely valuable for the identification and chemical characterisation of surface features in drill cores. The rapid analysis speed and excellent analytical resolution (500 $\times$ 500  $\mu$ m used in this study) are highly complementary to the applied CT scanning technique. Higher resolution analyses would likely further enhance the data quality and compatibility with CT scanning data. A resolution of 100 $\times$ 100  $\mu$ m is routinely possible with the JETSTREAM, for instance. Furthermore, the quality of  $\mu$ XRF elemental analysis could be improved when running the system under He-flush. This is expected to significantly enhance the signal quality for Si and Al, two of the most critical elements when identifying anomalous grains such as IRD on cut core surfaces. Differentiation between drill pipe contamination and IRD should be possible based on the density difference. Steel has > 7 g/cm<sup>3</sup>, while IRD is expected to show a density range between 2.5 and 3.8 g/cm<sup>3</sup>. Once accurately calibrated, this could be done with available CT scanning data and the applied WEKA machine learning tool. However, further work and  $\mu$ XRF data would be necessary to achieve this, as the Site 266 core sections used for this study did not have large visible IRD grains present.. Hence, we could not unequivocally differentiate between IRD and drill pipe contamination when selecting the key features for training the WEKA classifier. Ultimately, our non-destructive multi-proxy approach represents a new benchmark for consistent high-resolution imaging of sedimentary core material. Identifying drill-pipe contamination through  $\mu$ XRF and EDS analysis highlights that it remains

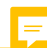

critical to ascertain the origin and chemical composition of high-density grains in legacy core material before attempting meaningful sedimentological and paleoclimatological interpretation.

## 5 Conclusions and Outlook

For the first time, it has been possible to collect  $\mu$ XRF data on entire section halves using the open-beam system incorporated into the Bruker M6 JETSTREAM in a way that was previously not possible due to limits in chamber dimensions. The  $\mu$ XRF data can be used to identify surface elemental variability of sedimentary core surfaces, and is an immensely valuable dataset for high-resolution characterisation of the chemical composition of sediment. For instance, here we could identify the Fe/Mn signature of drill pipe and distinguish surface records of IRD from drill pipe contamination at DSDP Site 266.

Furthermore, we have shown that medical CT-scanning data of legacy core material holds **unprecedented power** for machine learning-based sediment classification and segmentation. Although powerful, fast, and reliable, any such automated classification still requires careful validation and ideally discrete testing of base assumptions. Here, we also wish to highlight the power of  $\mu$ XRF core imaging as an independent fast verification tool that should be used with most CT-based classification algorithms, especially for IRD detection over large (hundreds of meters or more) core material. This study provided 3 key conclusions.

1.  $\mu$ XRF and CT scanning data of legacy core material are highly complementary, fast, and reliable non-destructive analysis tools that provide unprecedented information. IODP legacy core material stored in the three Core Repositories especially stands to benefit immensely from its future application and adoption by the community.
2. Already available machine learning classification and segmentation-based CT scanning, such as the trainable 3D WEKA segmentation implemented in Fiji, is highly successful in consistently characterising sedimentary features, such as density anomalous grains (e.g., IRD, drill pipe contamination) in legacy core material.
3. Successfully applying machine learning algorithms requires high-quality control pre- and post-analysis. In situ  $\mu$ XRF analysis of entire core section halves is now possible with technological advancements such as the Bruker M6 JETSTREAM. Such whole-section 2D  $\mu$ XRF analyses enable high-fidelity 2D elemental imaging capabilities and provide the necessary data to **ground-truth** density-based CT-scanning analyses with fully correlatable surface elemental information.

In conclusion, while ultimately unsuccessful in its original goals, our study provides an **up-and-coming methodological framework** for future high-resolution CT scanning and elemental imaging-based analyses of legacy core material for IRD quantification.



340 **Code and data availability**

341 All data and supplementary text are available on Zenodo (DOI: 10.5281/zenodo.15543202)

342 **Supplement**

343 All data and supplementary text are available on Zenodo (DOI: 10.5281/zenodo.15543202)

344 **Author Contributions**

345 GA and DDV conceptualised the study. YK and AS carried out the CT scanning and  $\mu$ XRF data acquisition. GA carried out  
346 CT-image machine learning data analyses, IRD picking, and SEM-EDS analyses, and DDV and AS performed the  $\mu$ XRF data  
347 analyses. All authors were part of the ReC23-01 Science Party and contributed to data capture, analyses, and interpretation  
348 during and after the workshop. GA and DDV wrote the paper and drafted the figures with input from all co-authors.  
349

350 **Financial Support**

351 This research was funded by the Austrian Science Fund (FWF) [Grant DOI: 10.55776/P36046] awarded to GA. For the purpose  
352 of open access, the authors have applied a CC BY public copyright licence to any Author Accepted Manuscript version arising  
353 from this submission. Additional funding was provided by a NAWI Graz Visiting Award for High Potentials, awarded to GA.  
354 Funding for  $\mu$ XRF scanning was provided by the Japan Society for the Promotion of Science (JSPS) KAKENHI Grant (grant  
355 no. 22KJ149800) awarded to AS. AJD was funded by the Natural Environment Research Council (grant number:  
356 NE/W009366/1) and the Royal Society (grant number: DHF\R1\221091).

357 **Competing interests**

358 The contact author has declared that none of the authors has any competing interests.

359 **Acknowledgements**

360 This research used samples and data provided by the International Ocean Discovery Program (IODP) and its predecessors. We  
361 thank the DSDP Leg 28 shipboard science party, the crew, and the technical staff of D/V Glomar Challenger. We thank Manabu  
362 Mizuhira (Bruker Japan) for his assistance with  $\mu$ XRF measurement and analysis. This study was conducted under the  
363 Repository Core Re-Discovery Program (ReCoRD) ReC23-01 workshop, a collaborative program between Kochi Core Center  
364 and J-DESC.



365 **Team List: Author Affiliations and Emails (in alphabetical order)**

366 **Or M. Bialik**, University of Münster, Institute of Geology and Palaeontology, Münster, Germany (obialik@uni-münster.de)

367 **Beth Christensen**, Rowan University, Department of Environmental Science, School of Earth and Environment, Glassboro,  
368 NJ, USA (christensenb@rowan.edu)

369 **Tamara Hechemer**, University of Graz, Department of Earth Sciences, NAWI Graz Geocenter, Graz, Austria  
370 (tamara.hechemer@uni-graz.at)

371 **An-Sheng Lee**, National Taiwan University, Department of Geosciences and Research Center for Future Earth, Taipei,  
372 Taiwan; now at: Marine Core Research Institute, Kochi University, Kochi, Japan.

373 **Jing Lyu**, University of Münster, Institute of Geology and Palaeontology, Münster, Germany (j.lyu@uni-muenster.de)

374 **Theresa Nohl**, University of Vienna, Faculty of Earth Sciences, Geography and Astronomy, Department of Palaeontology,  
375 Vienna, Austria (theresa.nohl@univie.ac.at)

376 **Natsumi Okutsu**, Japan Agency for Marine-Earth Science and Technology, Institute for Marine-Earth Exploration and  
377 Engineering, Yokosuka, Japan (okutsun@jamstec.go.jp)

378 **Werner E. Piller**, University of Graz, Department of Earth Sciences, NAWI Graz Geocenter, Graz, Austria  
379 (werner.piller@uni-graz.at)

380 **Xabier Puentes-Jorge**, University of Graz, Department of Earth Sciences, NAWI Graz Geocenter, Graz, Austria  
381 (xabier.puentes-jorge@uni-graz.at)

382 **Jumpei Yoshioka**, National Institute of Polar Research, Research Organization of Information and Systems, 10-3, Midori-  
383 cho, Tachikawa, Tokyo, Japan (yoshioka.jumpei@nipr.ac.jp)

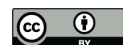

## References

- Albarède, F., Goldstein, S. L., and Dautel, D.: The neodymium isotopic composition of manganese nodules from the Southern and Indian oceans, the global oceanic neodymium budget, and their bearing on deep ocean circulation, *Geochim. Cosmochim. Acta*, 61, 1277–1291, [https://doi.org/10.1016/s0016-7037\(96\)00404-8](https://doi.org/10.1016/s0016-7037(96)00404-8), 1997.
- Arganda-Carreras, I., Kaynig, V., Rueden, C., Eliceiri, K. W., Schindelin, J., Cardona, A., and Seung, H. S.: Trainable Weka Segmentation: a machine learning tool for microscopy pixel classification, *Bioinformatics*, 33, 2424–2426, <https://doi.org/10.1093/bioinformatics/btx180>, 2017.
- Auer, G., Kuroda, J., Kubo, Y., Bialik, O. M., Drury, A. J., Christensen, B., Seki, A., Nohl, T., Yoshioka, J., Puentes Jorge, X., Hechemer, T., Lyu, J., Lee, A.-S., Okutsu, N., De Vleeschouwer, D., Piller, W. E., and Ikehara, M.: ReC23-01 – Initial Results of the first KCC-J-DESC Repository Core Re-Discovery Program (ReCoRD), EGU General Assembly 2024, Vienna, Austria, 14–19 Apr 2024, EGU24-16452, <https://doi.org/10.5194/egusphere-egu24-16452>, 2024.
- Auer, G., De Vleeschouwer, D., Seki, A., Drury, A. J., Kubo, Y., Ikehara, M., Kuroda, J., & ReC23-01 scientists, Supplementary Materials and Supplementary Text for the Submission "Automated Detection and Chemical Characterization of Anomalous Grains in Scientific Ocean Drilling Legacy Cores" (1.0) [Data set]. Zenodo, <https://doi.org/10.5281/zenodo.15543202>, 2025.
- Bailey, I., Foster, G. L., Wilson, P. A., Jovane, L., Storey, C. D., Trueman, C. N., and Becker, J.: Flux and provenance of ice-rafted debris in the earliest Pleistocene sub-polar North Atlantic Ocean comparable to the last glacial maximum, *Earth Planet. Sci. Lett.*, 341, 222–233, <https://doi.org/10.1016/j.epsl.2012.05.034>, 2012.
- Bornhold, B. D.: Ice-Rafted Debris in Sediments from Leg 71, Southwest Atlantic Ocean, in: Initial Reports of the Deep Sea Drilling Project, 71, edited by: Ludwig, W. J., Krashenninnikov, V. A., and Wise Jr., S. W., 307–316, <https://doi.org/10.2973/dsdp.proc.71.110.1983>, 1983.
- Conolly, J. R. and Ewing, M.: Ice-Rafted Detritus as a Climatic Indicator in Antarctic Deep-Sea Cores, *Science*, 150, 1822–1824, <https://doi.org/10.1126/science.150.3705.1822>, 1965.
- Cooke, D. W. and Hays, J. D.: Estimates of Antarctic Ocean Seasonal Sea-Ice Cover during Glacial Intervals, in: Antarctic Geoscience : Proceedings of 1977 Symposium, edited by: Craddock, C., The University of Wisconsin Press, Madison, 1017–1025, 1982.
- Feignon, J., Graaff, S. J. de, Ferrière, L., Kaskes, P., Déhais, T., Goderis, S., Claeys, P., and Koeberl, C.: Chicxulub impact structure, IODP-ICDP Expedition 364 drill core: Geochemistry of the granite basement, *Meteorit. Planet. Sci.*, 56, 1243–1273, <https://doi.org/10.1111/maps.13705>, 2021.
- Frery, E., Fryer, P., Kurz, W., Nguyen, A., Sissmann, O., Uysal, T., and Zhao, J.: Episodicity of structural flow in an active subduction system, new insights from mud volcano's carbonate veins – Scientific Ocean drilling expedition IODP 366, *Mar. Geol.*, 434, 106431, <https://doi.org/10.1016/j.margeo.2021.106431>, 2021.
- Godefroid, L. B., Sena, B. M., and Trindade, V. B. da: Evaluation of Microstructure and Mechanical Properties of Seamless Steel Pipes API 5L Type Obtained by Different Processes of Heat Treatments, *Mater. Res.*, 20, 514–522, <https://doi.org/10.1590/1980-5373-mr-2016-0545>, 2017.





- 419 Grobe, H.: A Simple Method for the Determination of Ice-Rafted Debris in Sediment Cores, *Polarforschung*, 57, 123–  
420 126, 1987.
- 421 Hansen, M. A., Passchier, S., Khim, B., Song, B., and Williams, T.: Threshold behavior of a marine-based sector of the  
422 East Antarctic Ice Sheet in response to early Pliocene ocean warming, *Paleoceanography*, 30, 789–801,  
423 <https://doi.org/10.1002/2014pa002704>, 2015.
- 424 Hayes, D. E., Frakes, L. A., and McCollum, D. W.: Initial Reports of the Deep Sea Drilling Project, 28, Initial Rep. Deep  
425 Sea Drill. Proj., <https://doi.org/10.2973/dsdp.proc.28.112.1975>, 1975.
- 426 Hodell, D. A., Channell, J. E. T., Curtis, J. H., Romero, O. E., and Röhl, U.: Onset of “Hudson  
427 Strait” Heinrich events in the eastern North Atlantic at the end of the middle Pleistocene  
428 transition (~640 ka)?, *Paleoceanography*, 23, <https://doi.org/10.1029/2008pa001591>, 2008.
- 429 Jasper, C. E., Dyer, B., Reilly, B. T., Williams, T., Hemming, S., and Raymo, M. E.: A 3.3-Million-Year Record of  
430 Antarctic Iceberg Rafted Debris and Ice Sheet Evolution Quantified by Machine Learning, *Paleoceanogr. Paleoclimatology*,  
431 39, e2024PA004897, <https://doi.org/10.1029/2024pa004897>, 2024.
- 432 Kanfoush, S. L., Hodell, D. A., Charles, C. D., Guilderson, T. P., Mortyn, P. G., and Ninnemann, U. S.: Millennial-Scale  
433 Instability of the Antarctic Ice Sheet During the Last Glaciation, *Science*, 288, 1815–1819,  
434 <https://doi.org/10.1126/science.288.5472.1815>, 2000.
- 435 Kaskes, P., Déhais, T., Graaff, S. J. de, Goderis, S., and Claeys, P.: Large Meteorite Impacts and Planetary Evolution VI,  
436 171–206, [https://doi.org/10.1130/2021.2550\(07\)](https://doi.org/10.1130/2021.2550(07)), 2021.
- 437 Kaskes, P., Marchegiano, M., Peral, M., Goderis, S., and Claeys, P.: Hot carbonates deep within the Chicxulub impact  
438 structure, *PNAS Nexus*, 3, pgad414, <https://doi.org/10.1093/pnasnexus/pgad414>, 2024.
- 439 Kent, D., Opdyke, N. D., and Ewing, M.: Climate Change in the North Pacific Using Ice-Rafted Detritus as a Climatic  
440 Indicator, *GSA Bull.*, 82, 2741–2754, [https://doi.org/10.1130/0016-7606\(1971\)82\[2741:ccitnp\]2.0.co;2](https://doi.org/10.1130/0016-7606(1971)82[2741:ccitnp]2.0.co;2), 1971.
- 441 Labeyrie, L. D., Pichon, J. J., Labracherie, M., Ippolito, P., Duprat, J., and Duplessy, J. C.: Melting history of Antarctica  
442 during the past 60,000 years, *Nature*, 322, 701–706, <https://doi.org/10.1038/322701a0>, 1986.
- 443 Ledbetter, M. T. and Watkins, N. D.: Separation of primary ice-rafted debris from lag deposits, utilizing manganese  
444 micronodule accumulation rates in abyssal sediments of the Southern Ocean, *GSA Bull.*, 89, 1619–1629,  
445 [https://doi.org/10.1130/0016-7606\(1978\)89<1619:sopidf>2.0.co;2](https://doi.org/10.1130/0016-7606(1978)89<1619:sopidf>2.0.co;2), 1978.
- 446 McKay, R., Albot, O., Dunbar, G. B., Lee, J. I., Lee, M. K., Yoo, K., Kim, S., Turton, N., Kulhanek, D., Patterson, M.,  
447 and Levy, R.: A Comparison of Methods for Identifying and Quantifying Ice Rafted Debris on the Antarctic Margin,  
448 *Paleoceanogr. Paleoclimatology*, 37, <https://doi.org/10.1029/2021pa004404>, 2022.
- 449 Passchier, S.: Linkages between East Antarctic Ice Sheet extent and Southern Ocean temperatures based on a Pliocene  
450 high-resolution record of ice-rafted debris off Prydz Bay, East Antarctica, *Paleoceanography*, 26,  
451 <https://doi.org/10.1029/2010pa002061>, 2011.



Passchier, S., Hansen, M. A., and Rosenberg, J.: Quartz grain microtextures illuminate Pliocene periglacial sand fluxes on the Antarctic continental margin, *Depositional Rec.*, 7, 564–581, <https://doi.org/10.1002/dep2.157>, 2021.

Patterson, M. O., McKay, R., Naish, T., Escutia, C., Jimenez-Espejo, F. J., Raymo, M. E., Meyers, S. R., Tauxe, L., Brinkhuis, H., and Scientists, I. E. 318: Orbital forcing of the East Antarctic ice sheet during the Pliocene and Early Pleistocene, *Nature*, 7, 841–847, <https://doi.org/10.1038/ngeo2273>, 2014.

Piper, D. J. W. and Brisco, C. D.: Deep-Water Continental-Margin Sedimentation. DSDP LEG 28, Antarctica, in: Initial Reports of the Deep Sea Drilling Project 28, edited by: Hayes, D. E., Frakes, L. A., Barrett, P. J., Burns, D. A., Chen, P.-H., Ford, A. B., Kaneps, A. G., Kemp, E. M., McCollum, D. W., Piper, D. J. W., Wall, R. E., and Webb, P. N., 727–755, <https://doi.org/10.2973/dsdp.proc.28.121.1975>, 1975.

R Core Team: A Language and Environment for Statistical Computing, R, 2024.

Romanov, Y. A., Romanova, N. A., and Romanov, P.: Geographical distribution and volume of Antarctic icebergs derived from ship observation data, *Ann. Glaciol.*, 58, 28–40, <https://doi.org/10.1017/aog.2017.2>, 2017.

Schindelin, J., Arganda-Carreras, I., Frise, E., Kaynig, V., Longair, M., Pietzsch, T., Preibisch, S., Rueden, C., Saalfeld, S., Schmid, B., Tinevez, J.-Y., White, D. J., Hartenstein, V., Eliceiri, K., Tomancak, P., and Cardona, A.: Fiji: an open-source platform for biological-image analysis, *Nat. Methods*, 9, 676–682, <https://doi.org/10.1038/nmeth.2019>, 2012.

Smith, D. G., Ledbetter, M. T., and Ciesielski, P. F.: Ice-rafted volcanic ash in the South Atlantic sector of the Southern Ocean during the last 100,000 years, *Mar. Geol.*, 53, 291–312, [https://doi.org/10.1016/0025-3227\(83\)90047-6](https://doi.org/10.1016/0025-3227(83)90047-6), 1983.

Starr, A., Hall, I. R., Barker, S., Rackow, T., Zhang, X., Hemming, S. R., Lubbe, H. J. L. van der, Knorr, G., Berke, M. A., Bigg, G. R., Cartagena-Sierra, A., Jiménez-Espejo, F. J., Gong, X., Gruetzner, J., Lathika, N., LeVay, L. J., Robinson, R. S., Ziegler, M., Brentegani, L., Caley, T., Charles, C. D., Coenen, J. J., Crespin, J. G., Franzese, A. M., Han, X., Hines, S. K. V., Espejo, F. J. J., Just, J., Koutsodendris, A., Kubota, K., Norris, R. D., Santos, T. P. dos, Rolison, J. M., Simon, M. H., Tanguan, D., Lubbe, H. J. L. van der, Yamane, M., and Zhang, H.: Antarctic icebergs reorganize ocean circulation during Pleistocene glacial, *Nature*, 589, 236–241, <https://doi.org/10.1038/s41586-020-03094-7>, 2021.

Takase, A.: How to Improve the Resolution of X-ray CT Images, Let's Talk X-ray Imaging, 2024.

Verlaan, P. A., Cronan, D. S., and Morgan, C. L.: A comparative analysis of compositional variations in and between marine ferromanganese nodules and crusts in the South Pacific and their environmental controls, *Prog. Oceanogr.*, 63, 125–158, <https://doi.org/10.1016/j.poccean.2004.11.001>, 2004.

von Huene, R., Larson, E., and Crouch, J.: Preliminary study of ice-rafted erratics as indicators of glacial advances in the Gulf of Alaska, in: Initial Reports of the Deep Sea Drilling Project 18, edited by: Kulm, L. D., Huene, R. von, Duncan, J. R., Ingle, J. C., Kling, S. A., Musich, L. F., Piper, D. J. W., Pratt, R. M., Schrader, H.-J., Weser, O. E., and Wise JR., S. W., 835–842, <https://doi.org/10.2973/dsdp.proc.18.121.1973>, 1973.

Vorren, T. O., Lebesbye, E., Andreassen, K., and Larsen, K.-B.: Glacigenic sediments on a passive continental margin as exemplified by the Barents Sea, *Mar. Geol.*, 85, 251–272, [https://doi.org/10.1016/0025-3227\(89\)90156-4](https://doi.org/10.1016/0025-3227(89)90156-4), 1989.



- 485        Watkins, N. D., Keany, J., Ledbetter, M. T., and Huang, T.-C.: Antarctic Glacial History from Analyses of Ice-Rafted  
486        Deposits in Marine Sediments: New Model and Initial Tests, *Science*, 186, 533–536,  
487        <https://doi.org/10.1126/science.186.4163.533>, 1974.
- 488        Watkins, N. D., Ledbetter, M. T., and Huang, T.-C.: Antarctic glacial history using spatial and temporal variations of ice-  
489        ratted debris in abyssal sediments, in: *Antarctic Geoscience : Proceedings of 1977 Symposium*, edited by: Craddock, C., The  
490        University of Wisconsin Press, Madison, 1013–1016, 1982.
- 491        Williams, T., Flierdt, T. van de, Hemming, S. R., Chung, E., Roy, M., and Goldstein, S. L.: Evidence for iceberg armadas  
492        from East Antarctica in the Southern Ocean during the late Miocene and early Pliocene, *Earth Planet. Sci. Lett.*, 290, 351–  
493        361, <https://doi.org/10.1016/j.epsl.2009.12.031>, 2010.
- 494        Yang, K., Park, H., Baik, H., Kogure, T., and Kim, J.: The Formation of Fe-Bearing Secondary Phase Minerals from the  
495        Basalt—Sediment Interface, South Pacific Gyre: IODP Expedition 329, *Clays Clay Miner.*, 66, 1–8,  
496        <https://doi.org/10.1346/ccmn.2018.064083>, 2018.
- 497        Ziomek-Moroz, M.: Environmentally Assisted Cracking of Drill Pipes in Deep Drilling Oil and Natural Gas Wells, *J.*  
498        *Mater. Eng. Perform.*, 21, 1061–1069, <https://doi.org/10.1007/s11665-011-9956-6>, 2012.

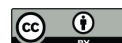

## Tables and Table Captions

**Table 1: Classification results of the WEKA segmentation based on 38849328 quantified pixels in each core section.** The last column presents the % abundance of IRD/Flakes classified pixels compared to the total sum of sediment-classified pixels, indicative of the percentage of IRD within the sediment.

| Section ID | IRD/flake | cracks | liner | D-tube | void   | sediment | IRD/flake in sediment |
|------------|-----------|--------|-------|--------|--------|----------|-----------------------|
| 266-8R3    | 0.00%     | 0.88%  | 4.09% | 15.74% | 50.40% | 28.89%   | 0.01%                 |
| 266-9R1    | 0.05%     | 0.80%  | 5.14% | 9.10%  | 69.28% | 15.62%   | 0.32%                 |
| 266-9R2    | 0.02%     | 3.61%  | 6.05% | 8.20%  | 58.61% | 23.51%   | 0.07%                 |
| 266-10R2   | 0.01%     | 1.34%  | 5.44% | 11.58% | 57.16% | 24.48%   | 0.04%                 |
| 266-11R2   | 0.01%     | 3.41%  | 5.66% | 8.85%  | 57.46% | 24.60%   | 0.03%                 |

**Table 2: Length measurements and interpreted primary mineralogy (based on SEM EDS results) of all picked grains >125 µm in sample 266-9R-2W 74/75.** Please refer to fig. 8 for the image and measurements of all picked grains.

| ID              | length [µm] | primary mineralogy (EDS)         |
|-----------------|-------------|----------------------------------|
| <i>cus</i>      | 477.58      | carbonate fluorapatite           |
| <i>IRD_01</i>   | 636.32      | quartz+feldspar                  |
| <i>IRD_02</i>   | 805.23      | pegmatite (see text)             |
| <i>IRD_03</i>   | 801.75      | quartz                           |
| <i>IRD_04</i>   | 474         | quartz                           |
| <i>IRD_05</i>   | 510.84      | quartz                           |
| <i>IRD_06</i>   | 586.98      | quartz                           |
| <i>IRD_07</i>   | 695.02      | Ca-feldspar                      |
| <i>IRD_08</i>   | 445.57      | Na-feldspar                      |
| <i>IRD_09</i>   | 553.5       | quartz                           |
| <i>IRD_10</i>   | 429.87      | K-feldspar                       |
| <i>IRD_11</i>   | 269.93      | quartz                           |
| <i>IRD_12</i>   | 497.69      | quartz                           |
| <i>IRD_13</i>   | 530.41      | quartz                           |
| <i>IRD_14</i>   | 645.51      | quartz                           |
| <i>IRD_15</i>   | 244.93      | Ni-Al alloy (Ni <sub>3</sub> Al) |
| <i>IRD_16</i>   | 281.67      | quartz                           |
| <i>IRD_17</i>   | 390.52      | quartz                           |
| <i>flake_01</i> | 1793.98     | MnV-Steel                        |
| <i>flake_02</i> | 341.99      | MnV-Steel                        |

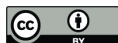

**Table 3: EDS quantification results of the drill pipe flake shown in Figure 6c compared to accepted values of American Petroleum Institute (API) X46 steel (Godefroid et al., 2017; Ziomek-Moroz, 2012).**

| Element      | wt%   | wt% Sigma | API X46 Steel<br>(min-max wt. %) |
|--------------|-------|-----------|----------------------------------|
| <b>O</b>     | 23.67 | 0.01      | /                                |
| <b>Si</b>    | 1.68  | 0.01      | 0.00 - 0.30                      |
| <b>S</b>     | 0.24  | 0.01      | 0.00 - 0.15                      |
| <b>K</b>     | 0.11  | 0.01      | 0                                |
| <b>Ca</b>    | 0.5   | 0.01      | 0                                |
| <b>V</b>     | 0.11  | 0.01      | 0.00 - 0.15                      |
| <b>Cr</b>    | 0     | N/A       | 0.00 - 0.15                      |
| <b>Mn</b>    | 1.31  | 0.02      | 1.30 - 1.40                      |
| <b>Fe</b>    | 71.95 | 0.05      | balance                          |
| <b>Cu</b>    | 0.25  | 0.03      | 0.00 - 0.20                      |
| <b>Zn</b>    | 0.18  | 0.03      | 0.00 - 0.15                      |
| <b>Mo</b>    | 0     | N/A       | 0.00 - 0.15                      |
| <b>Total</b> | 100   |           |                                  |

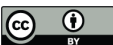

510 **Figures and Figure Captions**

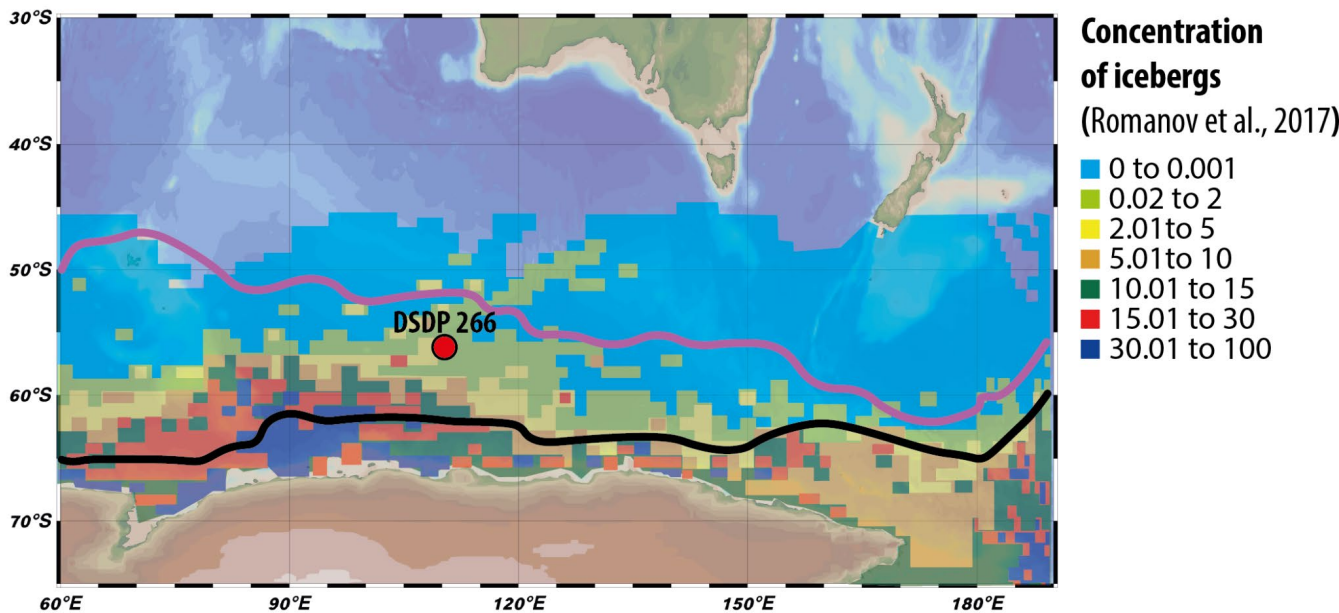

511  
512

513 **Figure 1: Location map.** The figure shows the Position of Site 266 in the southernmost Indian Ocean (56°24.13'S; 110°06.70'E).  
514 The map further shows the average present-day position of the polar front (purple), the southern extent of the antarctic  
515 circumpolar current (black) and the present-day iceberg concentrations based on observational data from Romanov et al. (2017)  
516 in the area. The colour-coded concentration reflects the number of icebergs sighted within a 15-nautical mile range from the  
517 observing ship. Basemap was generated in OceanDataView (ODV v5.7.2; Schlitzer et al., 2021).



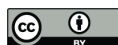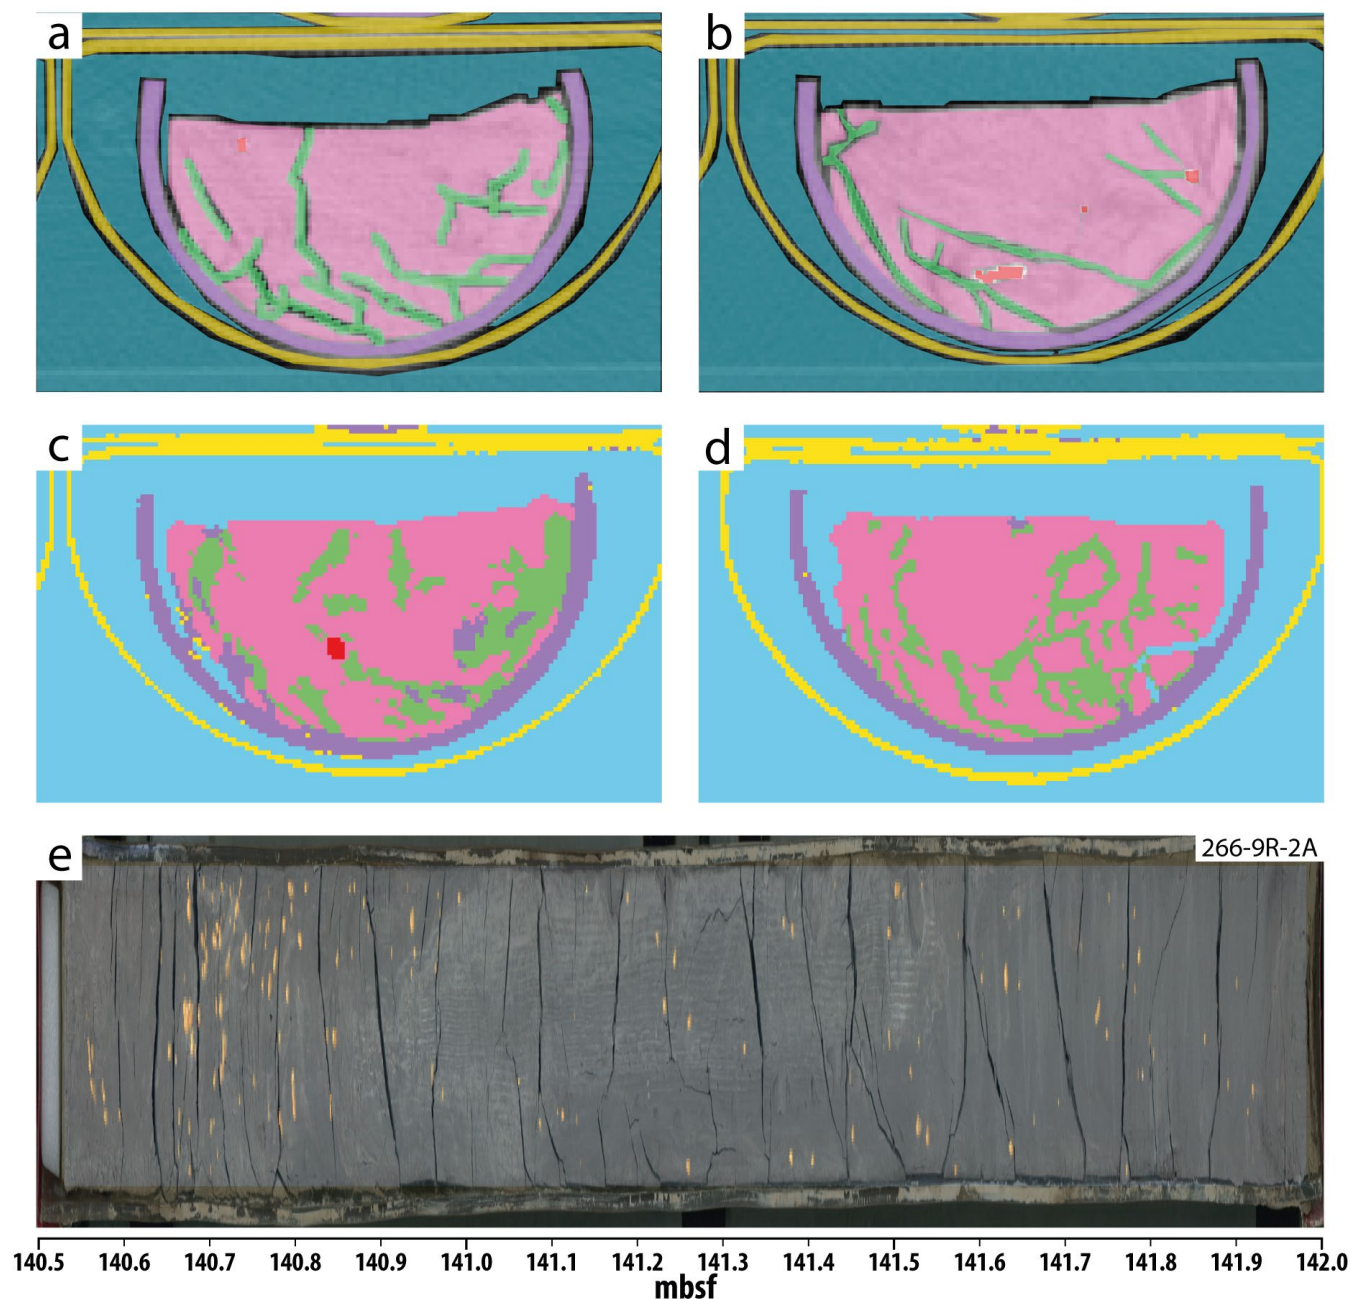

**Figure 2: 3D trainable WEKA segmentation and results:** Two WEKA training sets from section 266-8R-3A and 266-9R-2A (A and B, respectively). The six defined classes are (1) VOID (turquoise) = air/empty space; (2) D-TUBE (yellow) = the characteristic uniform density of the D-tube; (3) LINER (purple) = characteristic density of core liner; (4) CRACK (green) = visible cracks within the sediment; (5) SEDIMENT (pink) = sediment; (6) IRD (red) = high-density grains. WEKA classified all studied sections successfully, as shown through examples from Section 9R-1 (C) and 8R-3 (D). (E) flattened results of the WEKA algorithm of IRD/flake occurrences. The core image of section 266-9R-2A underlies the occurrences (vibrant orange). This way of processing WEKA results provides information similar to a standard X-radiograph.

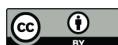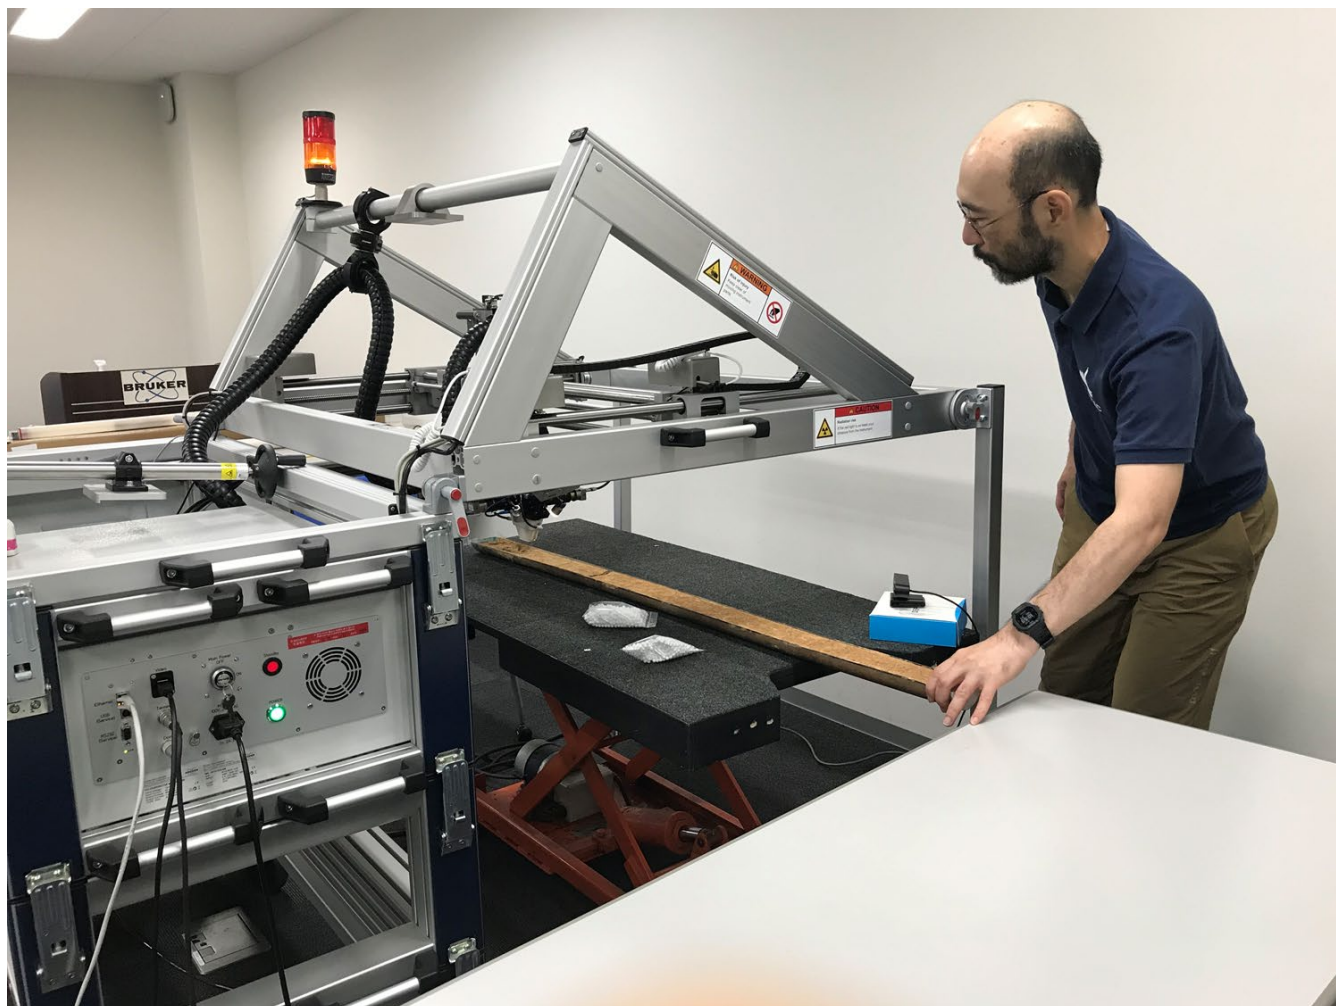

**Figure 3: Foto from Bruker M6 JETSTREAM. Y. Kubo loading the Bruker M6 JETSTREAM with a core section during the machine demonstration in August 2023 in Japan.**



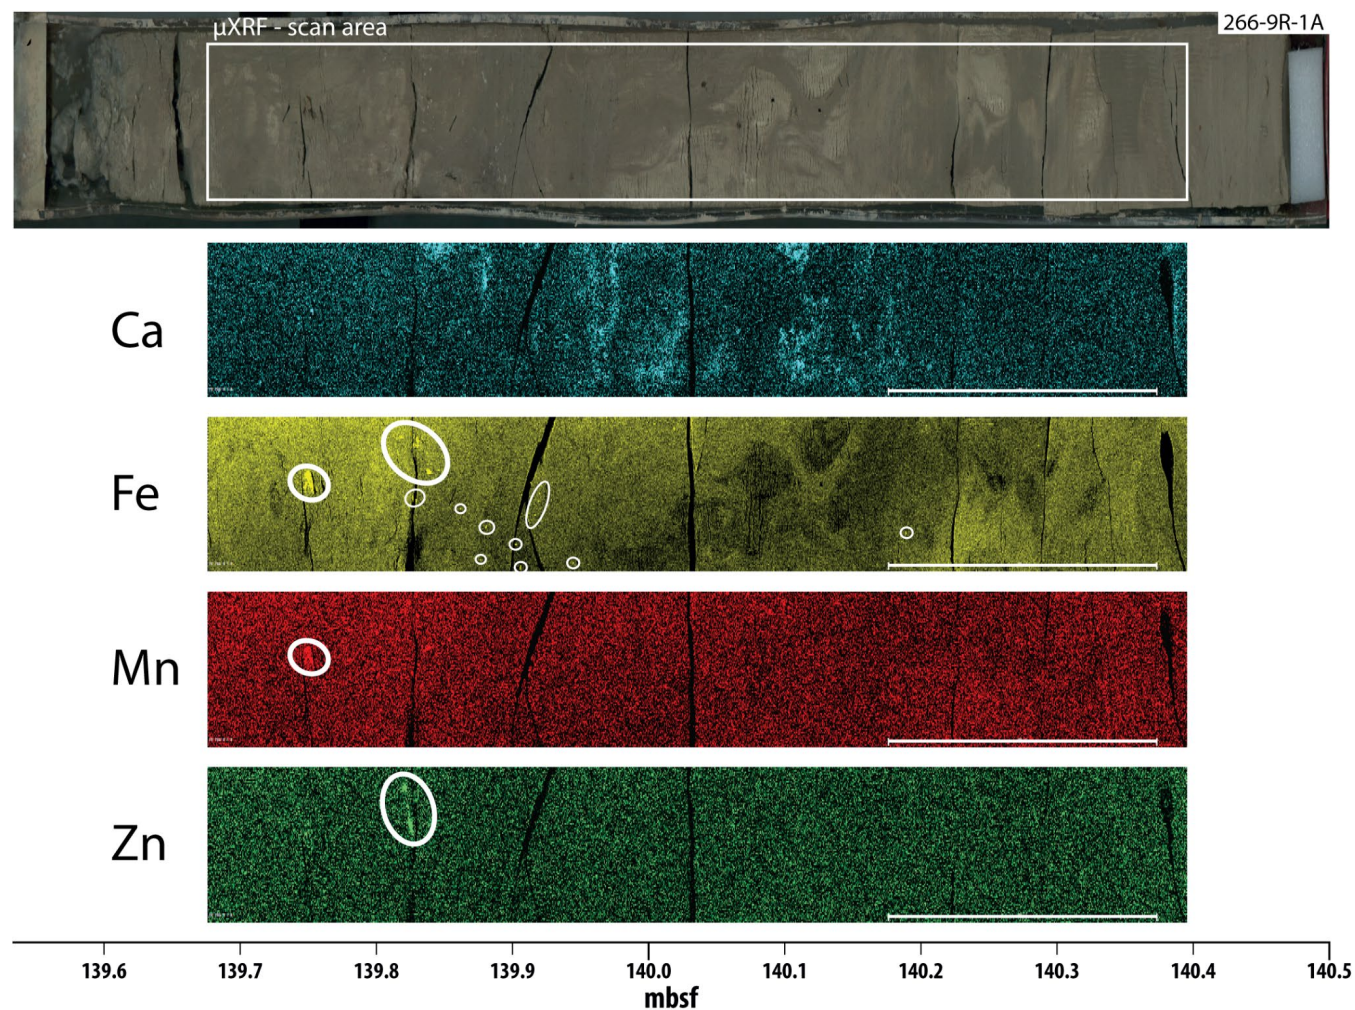

**Figure 4: Selected elements from MicroXRF Scan of DSDP Site 266-9R-1A.** Several anomalous grains of varying size emerge in the Fe, Mn and Zn data, marked by a white circle in each element. Ca concentration and Fe concentration also reflect sediment variability. Mottling is due to heavy rotary drilling disturbance.

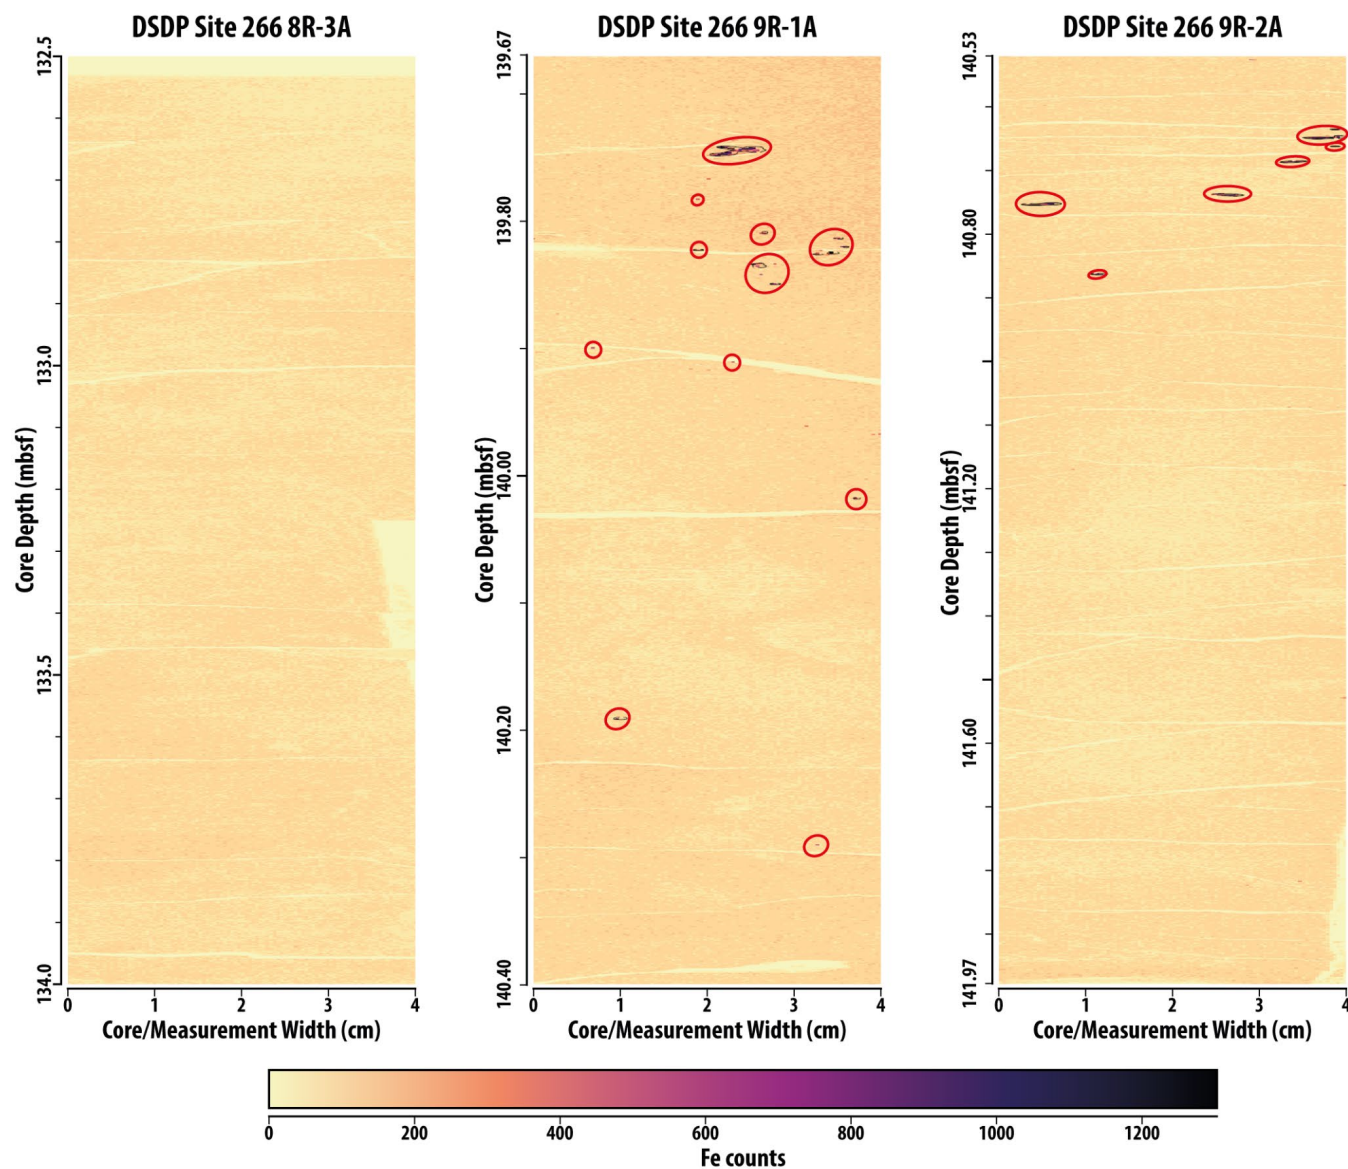

**Figure 5: Fe counts derived from  $\mu$ XRF scans.** Plots are overlain by a contour plot delineating anomalous grains. Red circles are added as a visual aid to show recorded contours in sections 266-9R-1A and 266-9R-2A.



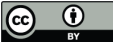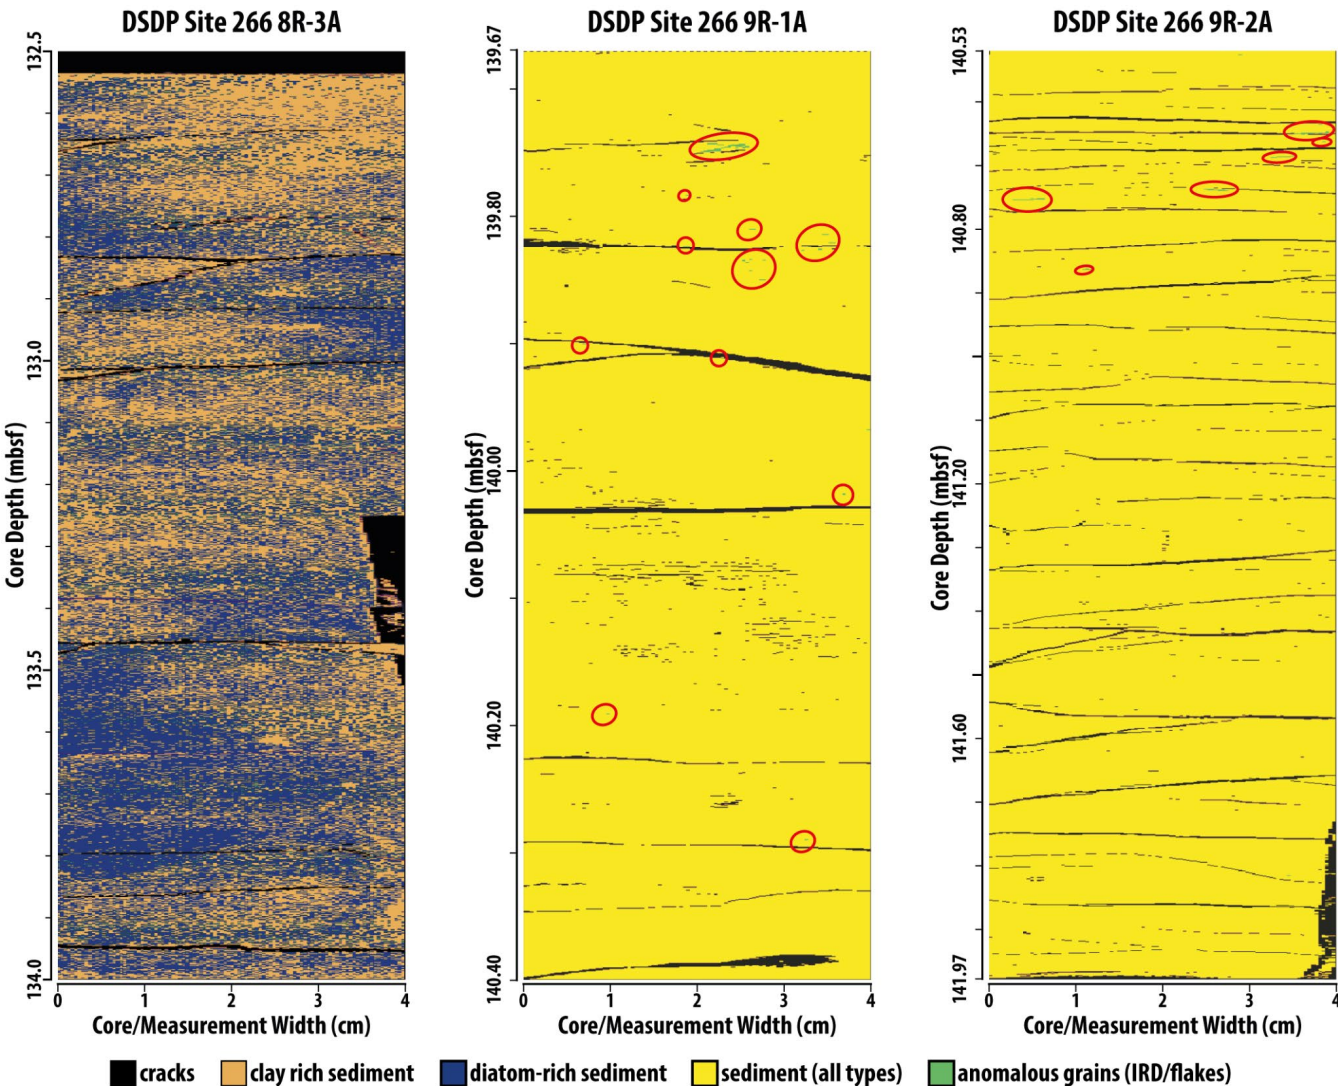

**Figure 6: Classification of  $\mu$ XRF elemental data.** 266-8R-3A shows no anomalous grains, so the k-means classification algorithm only differentiates between clay-rich, diatom-rich sediments and cracks ( $k = 3$ ). In 266-9R-1A and 266-9R-2A, the k-means classification algorithm produces meaningful results with  $k = 4$ , as the algorithm differentiates between clay-rich and diatom-rich sediments, cracks, and anomalous grains. High counts in Fe, Mn and Zn characterise the latter group.

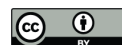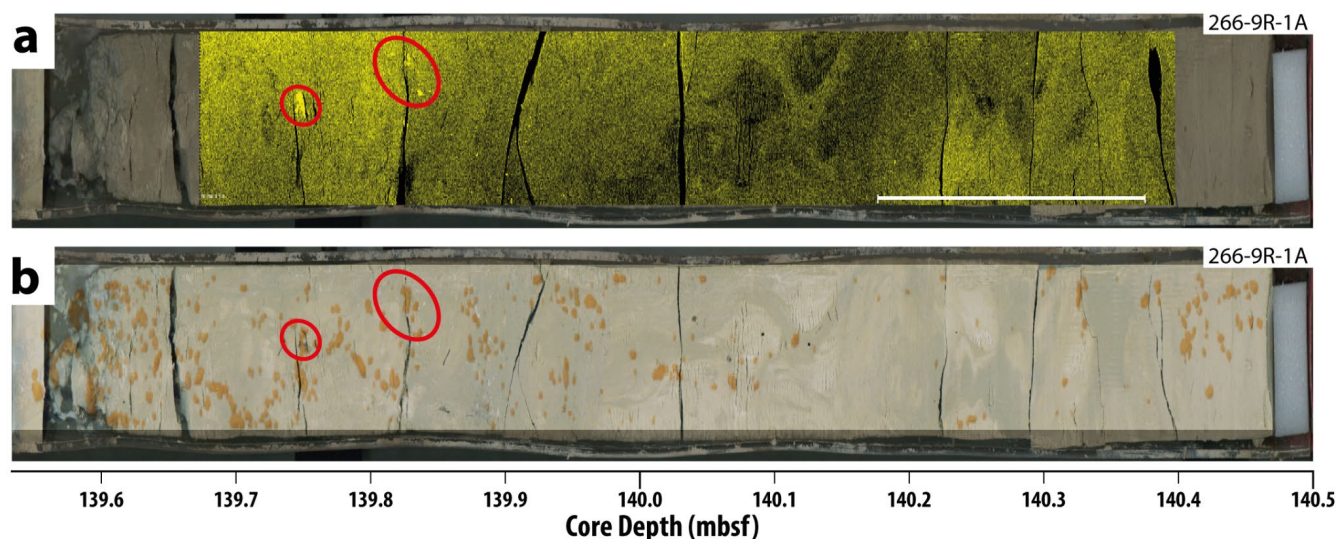

**Figure 7: Comparison of CT-image WEKA classification-derived IRD records.** Comparison of the  $\mu$ XRF derived Fe count intensity (yellow) with the 2D flattened occurrence cloud (orange) of high density grains based on the WEKA classifier. **a)** visual core image and  $\mu$ XRF data and image information for section 266-9R-1A. Note the highlighted areas of high Fe counts indicating anomalous grains encountered at the surface of the core section; **b)** comparison of the line scanned core image and the 2D flattened WEKA IRD/flake segmentation output. the red circles indicate the areas of outcropping high density grains that are also clearly visible in the surface  $\mu$ XRF data shown in a).



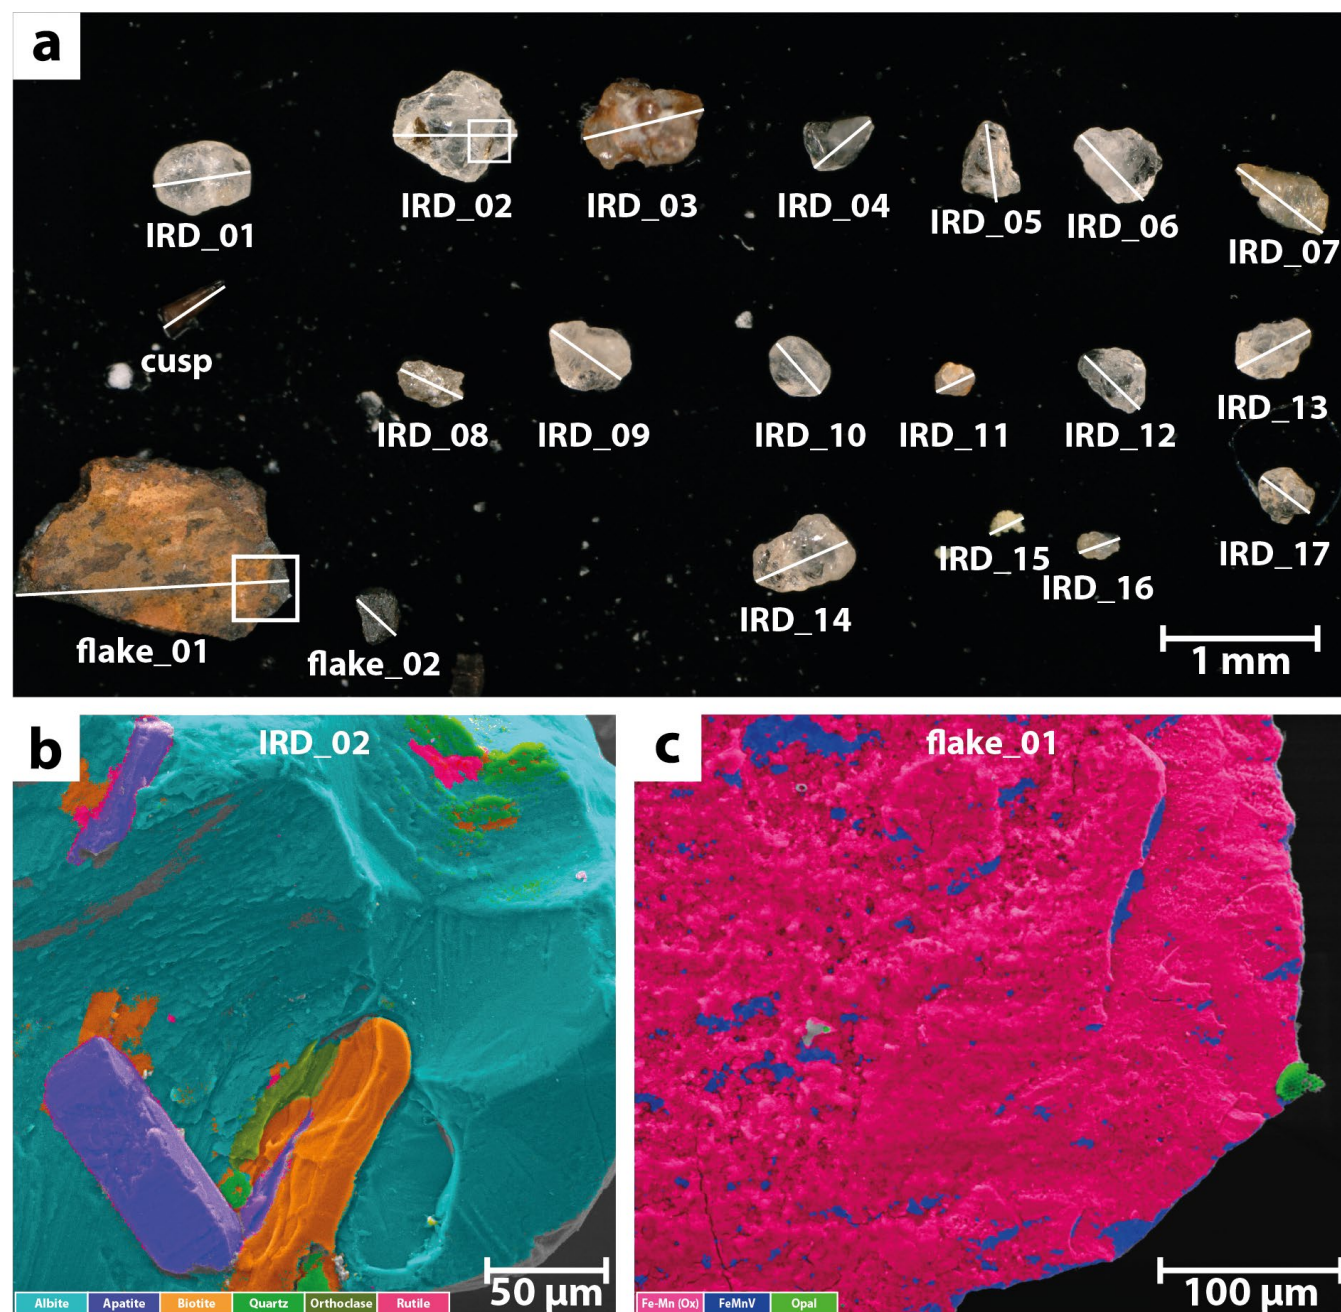

**Figure 8: Picked IRD and visualized EDS results.** Note the different scales of each image. **a)** Composite photomicrograph of the 20 picked grains from discrete sample 266-9R-2W 74/75. White bars indicate the measurement axis for maximum length determination. White boxes indicate the area of EDS analysis shown in b) and c). Note the large >1.7 mm iron flake in the lower left of the picture. **b)** Example of the EDS-based elemental clustering-based phase identification using the Oxford AZtec® software suite on a complex pegmatitic grain. **c)** Aztec phase identification of the iron flake showing the covering of Fe-Mn oxide-hydroxides as well as less corroded metal surfaces that also contained appreciable amounts of vanadium (V), also not the stuck radiolarian shell that was classified as biogenic silica (opal).
